# Supplementary material
Source: HighWire-hosted journal article supplement (https://bmjopen.bmj.com/content/10/2/e033069)
Supplement: inline-supplementary-material-1 [file inline-supplementary-material-1.pdf]

## Supplementary File 1

**Table 1: Topic guide for semi-structured interviews**

|                                        |                                                                                                                                                                                                                                                                                                                                                                                                                                                                                                                                                                             |
|----------------------------------------|-----------------------------------------------------------------------------------------------------------------------------------------------------------------------------------------------------------------------------------------------------------------------------------------------------------------------------------------------------------------------------------------------------------------------------------------------------------------------------------------------------------------------------------------------------------------------------|
| <b>FRAC clinic</b>                     | <p><i>To start I'd like you to think about your visit to the falls clinic here in XXX...</i></p> <ul style="list-style-type: none"> <li>– When did you attend the clinic? Did you go on your own?</li> <li>– Why did you attend the clinic? <ul style="list-style-type: none"> <li>○ Did you want to go?</li> </ul> </li> <li>– Who referred you to the clinic? <ul style="list-style-type: none"> <li>○ Did you receive an appointment? Did you speak to anyone on the phone before attending the clinic?</li> <li>○</li> </ul> </li> </ul>                                |
| <b>Assessment</b>                      | <p>So when you turned up for your appointment ...</p> <ul style="list-style-type: none"> <li>– Who did you meet?</li> <li>– What happened after that...</li> <li>– Did someone explain to you <ul style="list-style-type: none"> <li>○ Why you were there?</li> <li>○ What the assessment involved?</li> <li>○ What your results were? How did you feel about that?</li> </ul> </li> <li>– Did you understand what the visit would involve? <ul style="list-style-type: none"> <li>○ How did you feel during the visit?</li> </ul> </li> </ul>                              |
| <b>Outcome</b>                         | <ul style="list-style-type: none"> <li>– What kind of information were you told during your assessment? <ul style="list-style-type: none"> <li>○ How did that make you feel?</li> <li>○ Were you given an advice/recommendations? Why do you think you were told that?</li> <li>○ Was there any follow-up required? If so where/to who?</li> </ul> </li> <li>– Has anything changed since you attended the clinic? <ul style="list-style-type: none"> <li>○ Attended follow-up appointments, changed behaviour, feel motivated, reassured, empowered</li> </ul> </li> </ul> |
| <b>Acceptability</b>                   | <ul style="list-style-type: none"> <li>– Was it what you expected?</li> <li>– How satisfied/comfortable were you with the delivery of the clinic? <ul style="list-style-type: none"> <li>○ The content of the risk assessment (prompt: the various tests that were carried out)</li> <li>○ the way the assessment was carried out?</li> </ul> </li> </ul>                                                                                                                                                                                                                   |
| <b>Barriers &amp; Facilitators</b>     | <ul style="list-style-type: none"> <li>– What did you think of the service?</li> <li>– Do you think this service met your needs? In what way... <ul style="list-style-type: none"> <li>○ Why/why not?</li> </ul> </li> <li>– What were there any problems for you: <ul style="list-style-type: none"> <li>○ Attending the clinic</li> <li>○ During/after the assessment</li> </ul> </li> <li>– Were there any aspects of the clinic visit that you would change? Why?</li> <li>– Is there anything that would have made it easier/more likely for you to attend?</li> </ul> |
| <b>Appropriateness</b>                 | <ul style="list-style-type: none"> <li>– Do you think the visit/assessment was valuable for you? Why or why not?</li> <li>– Was the information you received relevant to you?</li> </ul>                                                                                                                                                                                                                                                                                                                                                                                    |
| <b>Additional relevant information</b> | <ul style="list-style-type: none"> <li>– Is the FRAC clinic an appropriate service for you? (<i>appropriateness</i>)</li> <li>– Do you think the visit/assessment was useful for you? Why or why not? (</li> <li>– Would you recommend <i>this clinic</i> to other people? Why or why not?</li> <li>– Do you have any specific suggestions to improve the FRAC clinics? <ul style="list-style-type: none"> <li>○ Is there anything that should be done differently?</li> </ul> </li> </ul>                                                                                  |
