# Supplementary material
Source: HighWire-hosted journal article supplement (https://bmjopen.bmj.com/content/10/2/e033069)
Supplement: inline-supplementary-material-4 [file inline-supplementary-material-4.pdf]

## Supplementary File 4

**Table 1: Summary of TDF domains, key themes, subthemes and example quotes.**

| TDF Domain                                    | Themes                                                                 | Subthemes                                                                 | Example Quotes                                                                                                                                                                                                                                                                                                                                                                                                                     |
|-----------------------------------------------|------------------------------------------------------------------------|---------------------------------------------------------------------------|------------------------------------------------------------------------------------------------------------------------------------------------------------------------------------------------------------------------------------------------------------------------------------------------------------------------------------------------------------------------------------------------------------------------------------|
| Knowledge                                     | <i>Knowing what to expect</i>                                          | Knowing what to expect during the assessment.                             | **‘Oh yes, [the referrer] explained it very clearly, there would be a nurse there and maybe a physio and maybe an occupational therapist and they would ask me questions and do some tests and then we would take it from there then’ (P15, Male, 80)                                                                                                                                                                              |
|                                               |                                                                        | Having a clear understanding of how they were referred to the assessment. | It was [occupational therapist name] that actually told us about the falls clinic. And then there was a nurse who rang from [the falls admin office], you see [occupational therapist] was thinking that we would probably have to go the [hospital clinic] but [the nurse] said there was a new one opening up in [new clinic location] and we could attend that. It would be nearer. And that’s how I got there. (P11, Male, 79) |
|                                               |                                                                        | Familiarity with the clinic location.                                     | [the service user] is quite confident going out [to the clinic], because he’s in and out there all the time anyway’ (P4, Male, 86)                                                                                                                                                                                                                                                                                                 |
| Skills                                        | <i>Being physically able</i>                                           | Able to drive to the clinic                                               | ‘I was able to drive down on the morning of the visit’ (P16, Female, 79)                                                                                                                                                                                                                                                                                                                                                           |
|                                               |                                                                        | Able to walk a distance from the car to the clinic.                       | ‘there was no [parking] outside so I had to go down and I parked on the right hand side just above the shops’ (P10, Male, 81)                                                                                                                                                                                                                                                                                                      |
| *Social/<br>professional role<br>and identity | <i>Being that ‘type of person’</i>                                     |                                                                           | “I thought, I’d just go and do what I’m told. But I’m that type of person, if you tell me to do something, I’ll do it. Because that was the way I was brought up”. (P8, Female, 72)                                                                                                                                                                                                                                                |
| Optimism                                      | <i>Having confidence in and being positive towards health services</i> | Previous positive experiences of health services.                         | ‘Every single [health professional] that we’ve come across, everywhere, has been fabulous’ (P1, Female, 82)                                                                                                                                                                                                                                                                                                                        |

|                                             |                                                                                        |                                                                       |                                                                                                                                                                                                                                                                                                    |
|---------------------------------------------|----------------------------------------------------------------------------------------|-----------------------------------------------------------------------|----------------------------------------------------------------------------------------------------------------------------------------------------------------------------------------------------------------------------------------------------------------------------------------------------|
| <b>Beliefs about consequences</b>           | <i>Imagining the benefits given previous positive experiences with health services</i> | Attending the assessment might benefit others                         | "Well I thought if I can help anybody and this might sound rather silly and ridiculous but if my fall can help somebody else along the way, well wouldn't that be nice" (P8, Female, 72)                                                                                                           |
|                                             |                                                                                        | I wanted to gain access to other health services and supports.        | [the healthcare professional told me before the appointment] we'll have a four wheel [rollator]. We'll have one of them there that day... and they had it for me (P7, Male, 71)                                                                                                                    |
| <b>Goals</b>                                | <i>Determination to maintain or regain independence</i>                                | I wanted to understand why I was falling.                             | I did [want to go to the assessment] straight away. Because you see there must be a reason, I'm falling. (P7, Male, 71)                                                                                                                                                                            |
|                                             |                                                                                        |                                                                       | 'I am determined [to get back on my feet] you see, I've made my mind up. Well I've no daughter, I can't bank on my son, he's away now and my husband works for himself' (P8, Female, 72)                                                                                                           |
| <b>*Environmental context and resources</b> | <i>Being 'linked in' with health and community services</i>                            | Connected with health service                                         | **the [public health nurse] came and she told us about the falls clinic, and then from the falls clinic we are in physiotherapy now' (P11, Male, 79)                                                                                                                                               |
|                                             |                                                                                        | Connected with health professionals                                   | **'When you have a public health nurse to represent you, you get [the appointment] quicker' (P13, Female, 69)                                                                                                                                                                                      |
|                                             |                                                                                        | Connected with local services and supports                            | I was afraid I was going to fall and I was always wary of it... I go [to the day centre] on a Wednesday. I was saying it to [the centre manager] and she must have said it to them and they said would I do the [the falls risk assessment] and I said 'I'd chance anything like' (P9, Female, 72) |
|                                             |                                                                                        | Connected with previous falls prevention programmes                   | 'I did this, physiotherapists came down from the health-board and they ran a course, about 8 weeks of exercises, elderly exercises, on a Tuesday morning....So at that falls group, this falls thing was mentioned.' (P1, Female, 82)                                                              |
| <b>*Social Influences</b>                   | <i>Having strong social support</i>                                                    | They encouraged me to attend the clinic and adhere to medical advice. | **My granddaughter is a physiotherapist there as well and when I phoned her and she came down after work and my daughter who is a nurse, they took me up... [When asked did you know what to                                                                                                       |

|                |                                          |                                                                                                                                                                                                               |
|----------------|------------------------------------------|---------------------------------------------------------------------------------------------------------------------------------------------------------------------------------------------------------------|
|                |                                          | expect?] I did really, I did because my granddaughter had told me....(P12, Female, 80)                                                                                                                        |
|                | They helped me to get to the clinic.     | 'My sister drove me up on the Monday, I think it was. She drove me up on the Sunday to see could we locate where it was. So I saw where it was then, so I knew where to go' (P2, Female, 77)                  |
| <b>Emotion</b> | <i>'Crippled' by the fear of falling</i> | I have a desperate dread, I used never be like that, but am, I have this fear of falling, do you know what I mean? I know that a bad fall, especially when you're elderly can ruin your life. (P10, Male, 81) |
